# Supplementary material
Source: Springer Nature journal article supplement (https://www.springermedizin.de/resource/supplementary/12906_2013_1347_MOESM4_ESM.pdf/9522518)

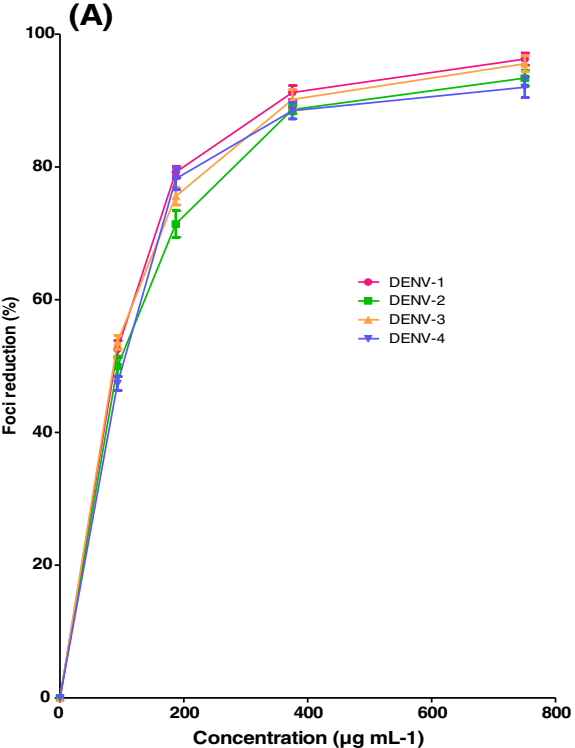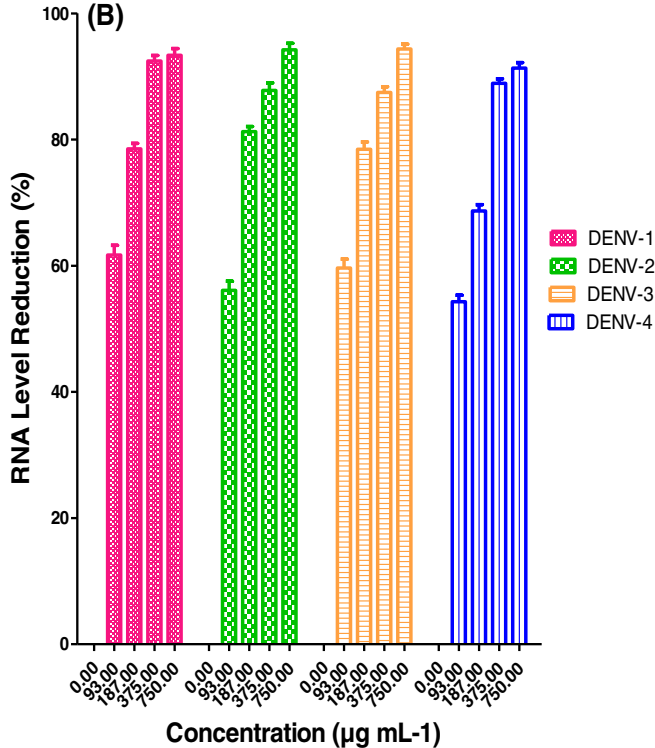

Supplement: MOESM4 [file 9522518]
